# Supplementary material for: River runoff in Switzerland in a changing climate – changes in moderate extremes and their seasonality
Source: Copernicus journal article supplement (doi:10.5194/hess-25-3577-2021), 2021-06-23
Supplement: Supplementary file 1 [file hess-25-3577-2021-supplement.pdf]

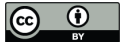

*Supplement of*

## **River runoff in Switzerland in a changing climate – changes in moderate extremes and their seasonality**

**Regula Muelchi et al.**

*Correspondence to:* Regula Muelchi ([regula.muelchi@giub.unibe.ch](mailto:regula.muelchi@giub.unibe.ch))

The copyright of individual parts of the supplement might differ from the article licence.

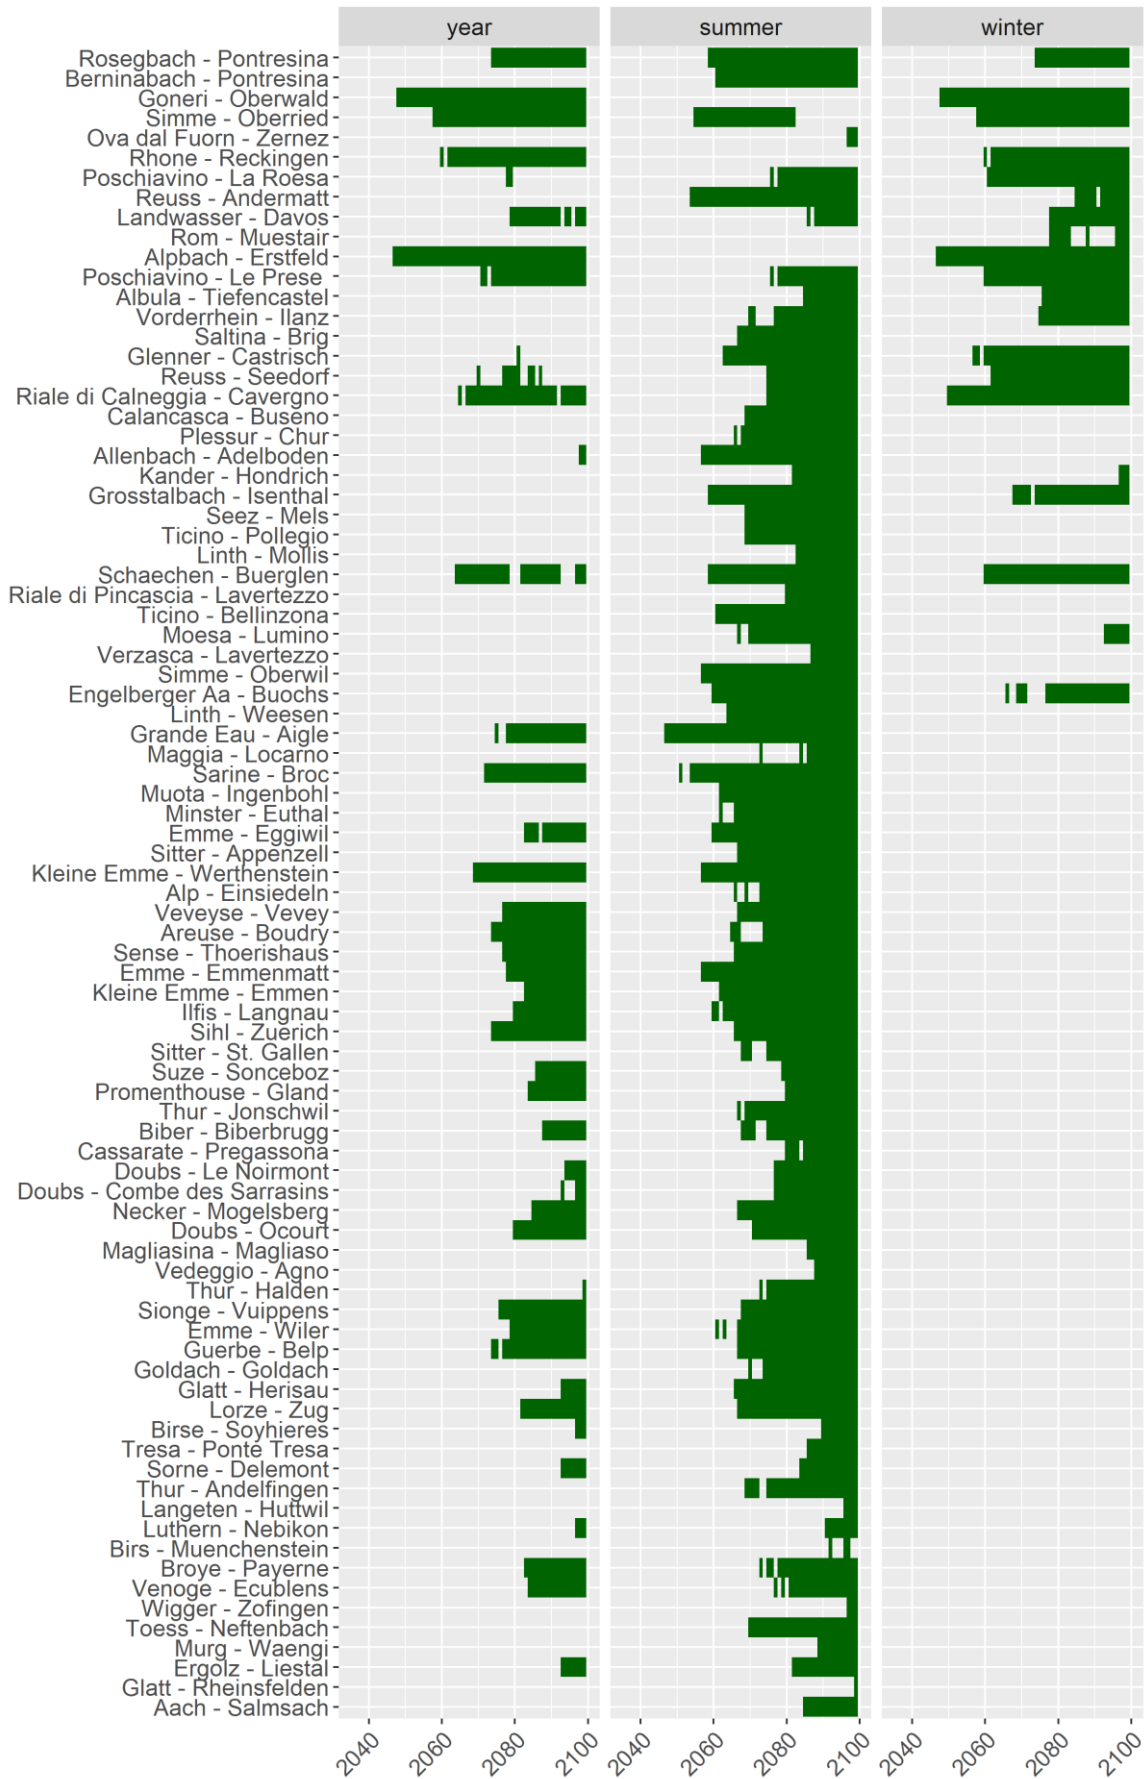

p-value ■ < 0.05

Figure S1: Temporal evolution of time of emergence of low-flow magnitudes. Periods where p-value of the Kolmogorov-Smirnov test is lower than 0.05 are highlighted. Only catchments with at least one detection of time of emergence in one of the time windows are shown. Catchments are ordered by decreasing mean elevation of catchment.

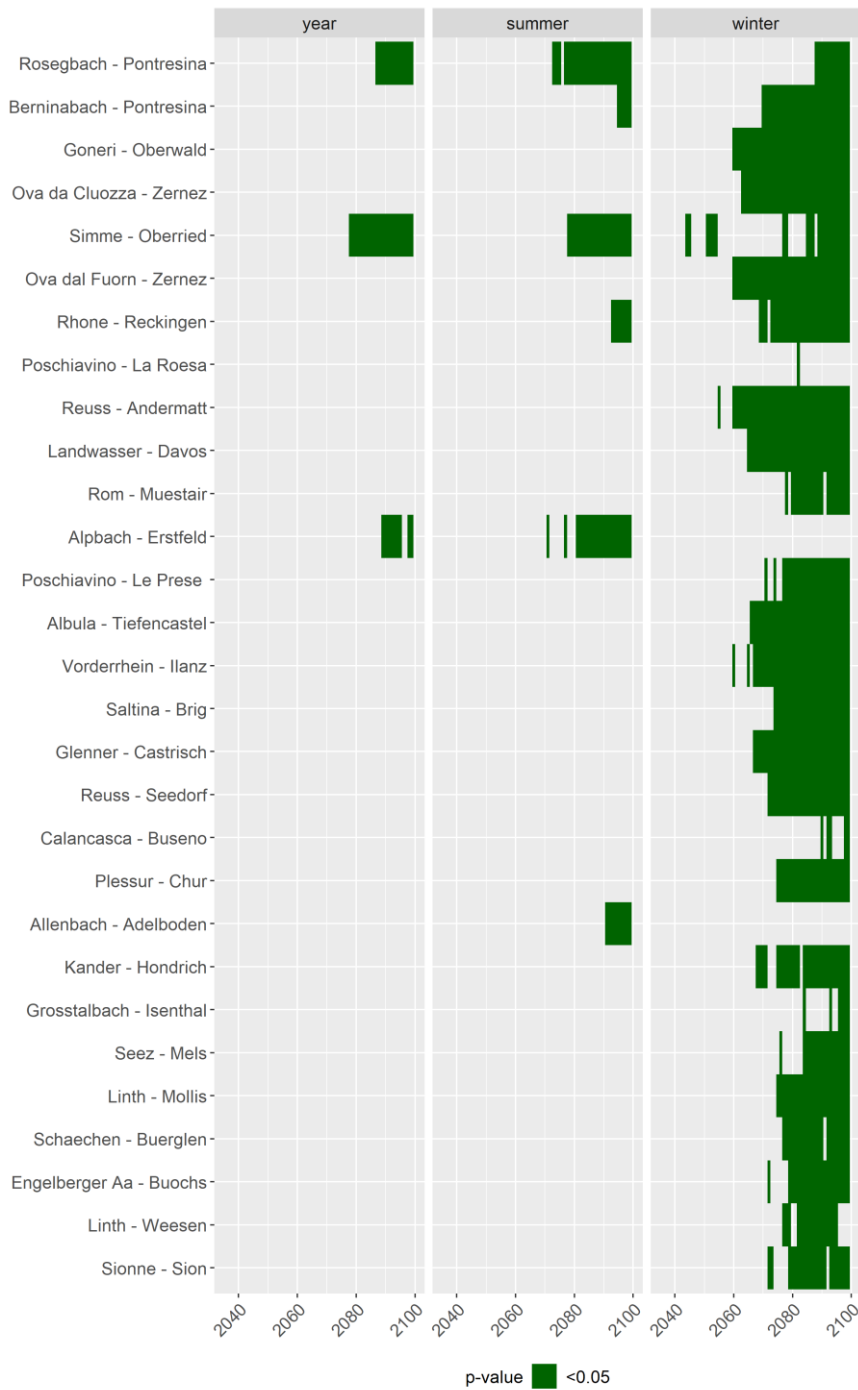

Figure S2: Temporal evolution of time of emergence of high-flow magnitudes. Periods where p-value of the Kolmogorov-Smirnov test is lower than 0.05 are highlighted. Only catchments with at least one detection of time of emergence in one of the time windows are shown. Catchments are ordered by decreasing mean elevation of catchment.
